# Supplementary material for: Temperature-induced amperometric glucose biosensor based on a poly(N-vinylcaprolactam)/graphene oxide composite film
Source: Royal Society of Chemistry journal article supplement (doi:10.1039/c8an02039f), 2019-01-01
Supplement: c8an02039f1.pdf [file c8an02039f1.pdf]

## Temperature-induced amperometric glucose biosensor based on a poly (N-vinylcaprolactam)/graphene oxide composited film

Chao Chen,<sup>ab</sup> Pengcheng Zhao,<sup>bc</sup> Meijun Ni,<sup>b</sup> Chunyan Li,<sup>b</sup> Yixi Xie<sup>bc\*</sup> and Junjie Fei<sup>ac\*</sup>

\* Corresponding authors

<sup>a</sup> Key Laboratory of Environmentally Friendly Chemistry and Applications of Ministry of Education, College of Chemistry, Xiangtan University, Xiangtan 411105, People's Republic of China

E-mail: fei\_junjie@xtu.edu.cn

<sup>b</sup> Key Laboratory for Green Organic Synthesis and Application of Hunan Province, Xiangtan 411105, People's Republic of China

E-mail: xieyixige@xtu.edu.cn

<sup>c</sup> Hunan Institute of Advanced Sensing and Information Technology, Xiangtan University, Xiangtan 411105, People's Republic of China

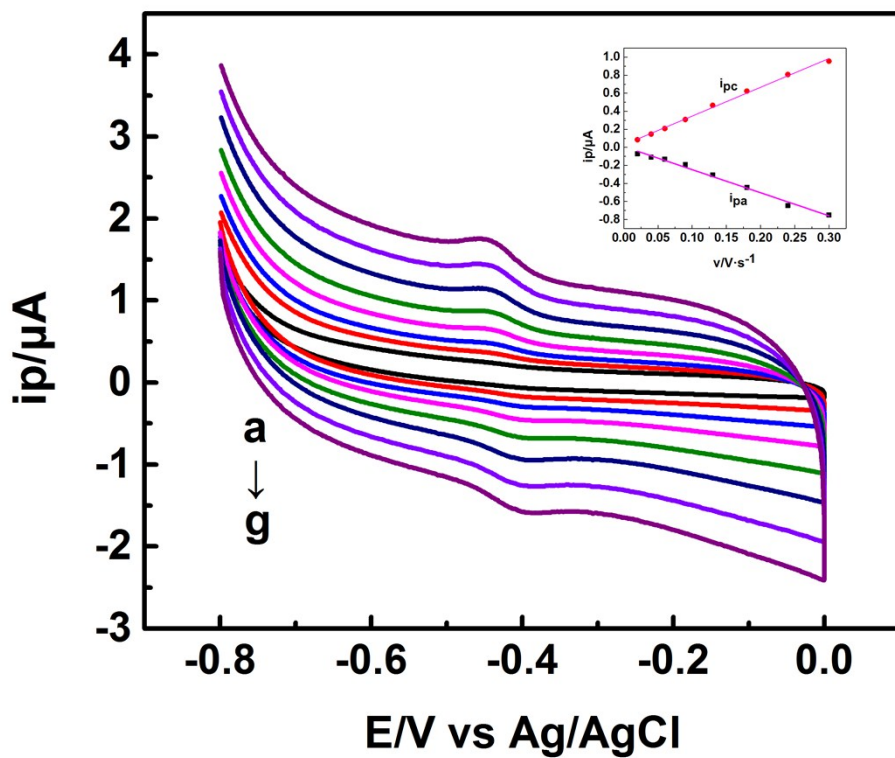

Fig. S1. Cyclic voltammograms of PVCL / GO / GOD / GCE at various scan rates from 20, 40, 60, 90, 130, 180, and 240 to 300  $\text{mV}\cdot\text{s}^{-1}$  respectively (from a to g). Inset: plot of peak current ( $i_p$ ) vs scan rate. Supporting electrolyte:  $0.1 \text{ mol}\cdot\text{L}^{-1}$  phosphate buffer (pH 7.0)

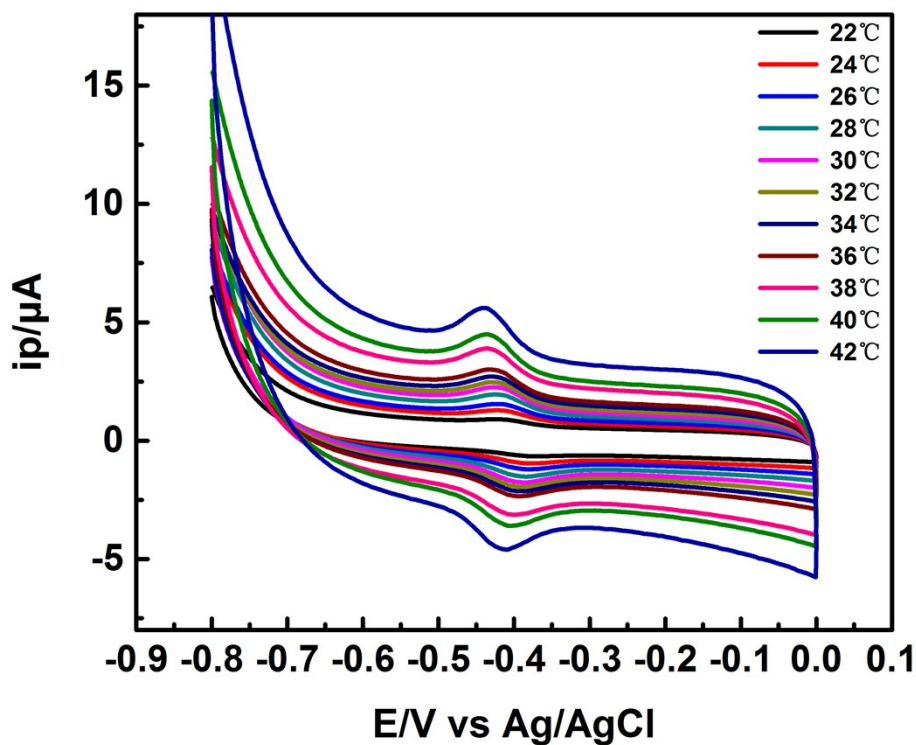

Fig. S2. CV plots of PVCL / GO / GOD / GCE at various temperatures from 22 to 42  $^{\circ}\text{C}$ ; Scan

rate:  $50 \text{ mV}\cdot\text{s}^{-1}$ ; Supporting electrolyte:  $0.1 \text{ mol}\cdot\text{L}^{-1}$  phosphate buffer (pH 7.0).

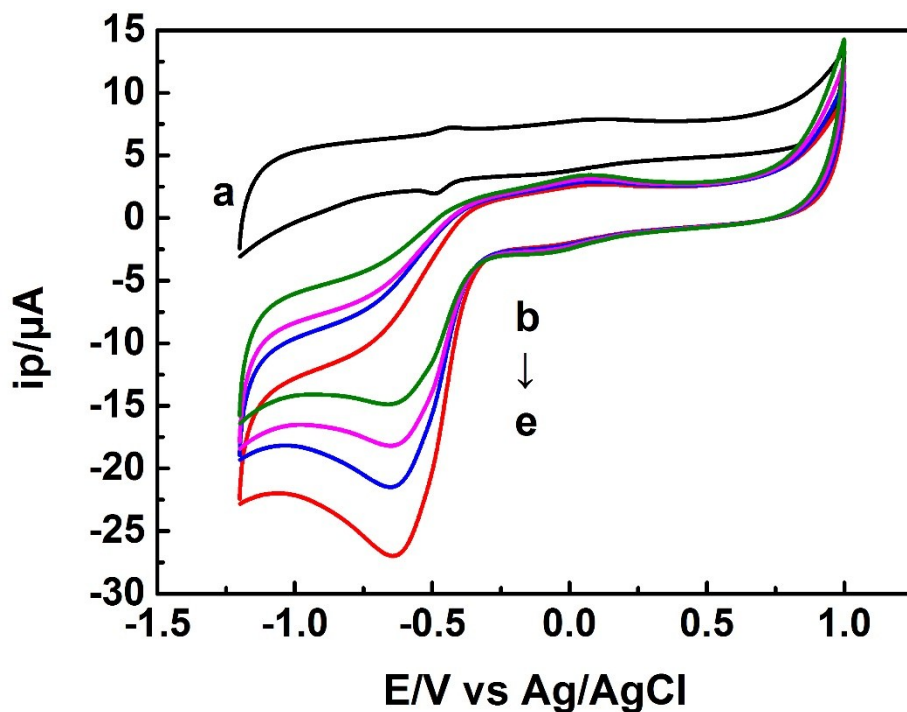

Fig. S3 CV plots of PVCL / GO / GOD / GCE at (a)  $\text{N}_2$ -saturated and at (b)(c)(d)(e)  $\text{O}_2$ -saturated with 0, 0.3, 0.5, 0.6 mM glucose Scan rate:  $50 \text{ mV}\cdot\text{s}^{-1}$ ; Supporting electrolyte:  $0.1 \text{ mol}\cdot\text{L}^{-1}$  phosphate buffer (pH 7.0)

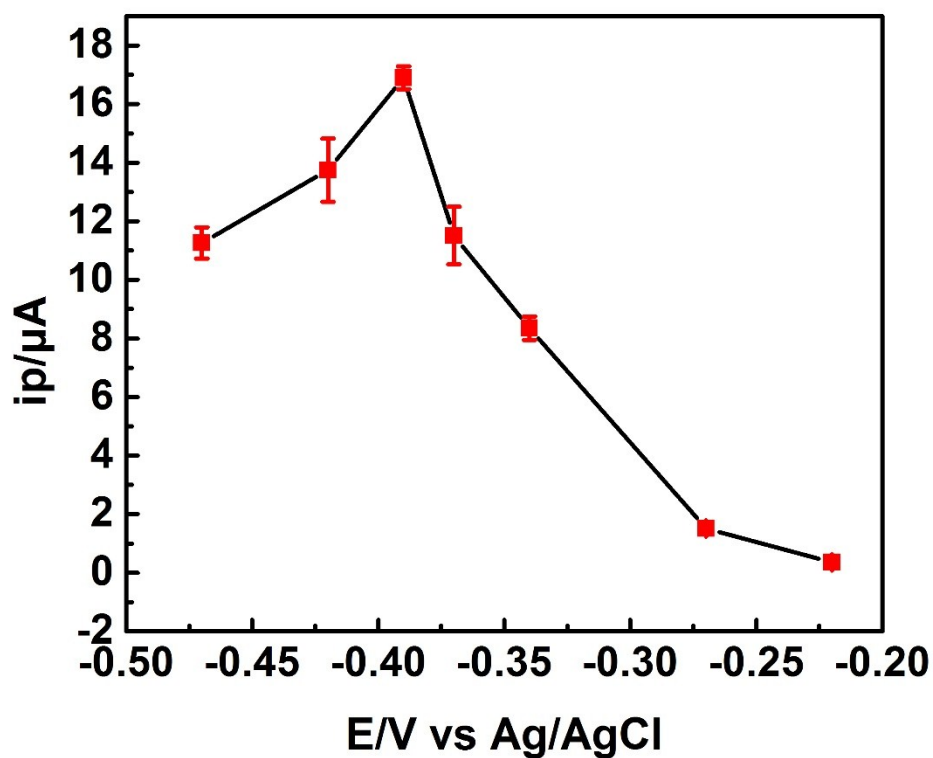

Fig.S4 under different potential ampere of glucose catalysis

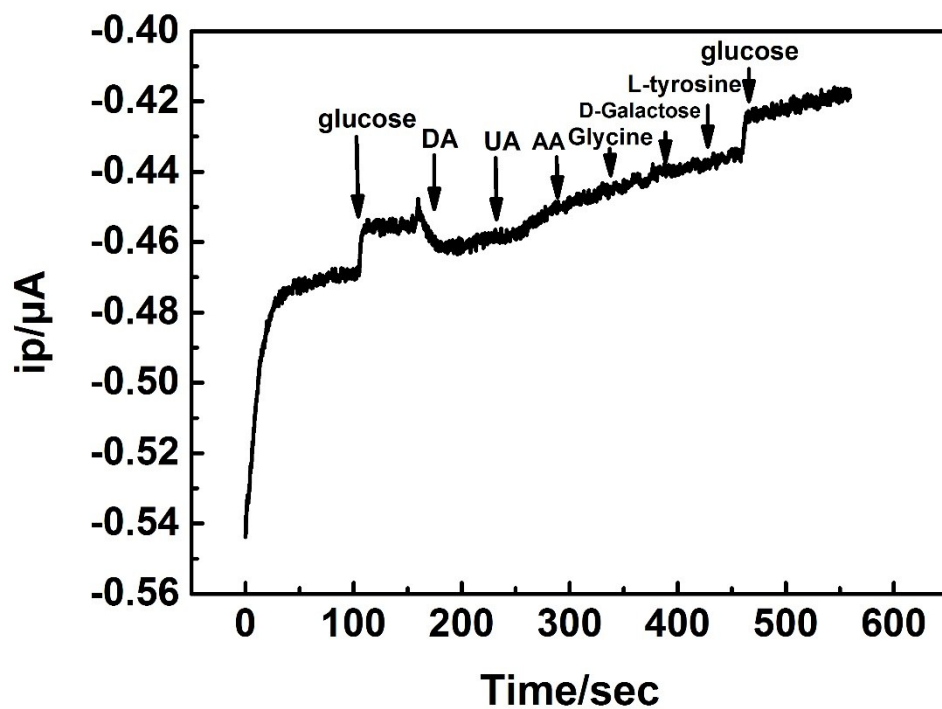

Fig. S5 Amperometric response of PVCL / GO / GOD / GCE at different interference

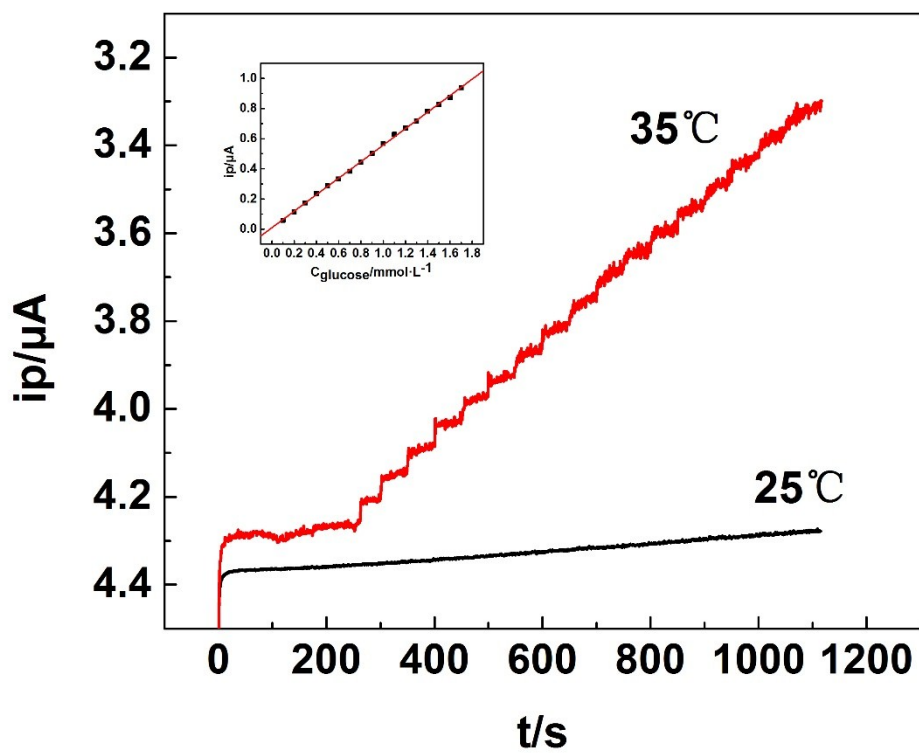

**Fig.S6** Amperometric response of PVCL / GO/ GOD / GCE to glucose compare 25°C to 35°C.the

inset: the current was proportional to the concentration of glucose at 35°C.
